# Supplementary material for: Candida auris in Dog Ears
Source: MDPI journal article supplement (doi:10.3390/jof9070720), 2023-06-30
Supplement: s1 [file s1]

**Table S2.** *In vitro* antifungal susceptibility profile of 10 yeast species isolated from dogs (n=87) against different antifungal drugs using CLSI-BMD method.

| Species (no. of strains tested) | Parameters                     | MICs (mg/L) <sup>a</sup> |           |           |            |           |          |           |           |           |
|---------------------------------|--------------------------------|--------------------------|-----------|-----------|------------|-----------|----------|-----------|-----------|-----------|
|                                 |                                | FLU                      | ITC       | VRC       | ISA        | POS       | AMB      | MFG       | AFG       | 5-FC      |
| <i>C. auris</i> (n=7)           | Range                          | 32->128                  | 0.06-1    | 0.03-0.5  | 0.12-0.25  | 0.015-0.5 | 0.25-0.5 | 0.25-1    | 0.01-0.06 | 0.125-0.5 |
|                                 | MIC <sub>50</sub> <sup>b</sup> | 64                       | 0.06      | 0.03      | 0.125      | 0.015     | 0.5      | 0.5       | 0.03      | 0.125     |
|                                 | MIC <sub>90</sub> <sup>c</sup> | >128                     | 0.7       | 0.5       | 0.75       | 0.35      | 0.5      | 1         | 0.06      | 0.35      |
| <i>M. pachydermatis</i> (n=15)  | Range                          | 1-4                      | 0.03-0.5  | 0.03-0.06 | 0.01-0.12  | 0.25-0.5  | 0.5      | 1         | 0.5-1     | 0.06      |
|                                 | MIC <sub>50</sub>              | 2                        | 0.04      | 0.03      | 0.06       | 0.25      | 0.5      | 1         | 0.75      | 0.06      |
|                                 | MIC <sub>90</sub>              | 3.4                      | 0.36      | 0.05      | 0.10       | 0.42      | 0.5      | 1         | 1         | 0.06      |
| <i>C. tropicalis</i> (n=17)     | Range                          | 1-2                      | 0.06-0.5  | 0.03-0.25 | 0.01-0.12  | 0.06-0.5  | 0.03-2   | 0.03-0.12 | 0.01      | 0.06-0.25 |
|                                 | MIC <sub>50</sub>              | 1                        | 0.12      | 0.06      | 0.12       | 0.25      | 1        | 0.03      | 0.01      | 0.06      |
|                                 | MIC <sub>90</sub>              | 2                        | 0.5       | 0.06      | 0.12       | 0.45      | 2        | 0.06      | 0.01      | 0.22      |
| <i>C. krusei</i> (n=8)          | Range                          | 16-32                    | 0.25-1    | 0.12-0.5  | 0.03-0.5   | 0.5       | 0.03-1   | 0.12-0.5  | 0.01-0.12 | 1-16      |
|                                 | MIC <sub>50</sub>              | 32                       | 1         | 0.25      | 0.25       | 0.5       | 0.25     | 0.5       | 0.01      | 16        |
|                                 | MIC <sub>90</sub>              | 32                       | 1         | 0.35      | 0.35       | 0.5       | 0.7      | 0.5       | 0.08      | 16        |
| <i>T. asahii</i> (n=7)          | Range                          | 0.25-1                   | 0.03-0.06 | 0.03-0.06 | 0.01-0.012 | 0.25-0.5  | 1-8      | 2-8       | 8         | 2-8       |
|                                 | MIC <sub>50</sub>              | 0.5                      | 0.03      | 0.03      | 0.06       | 0.25      | 2.5      | 8         | 8         | 3         |
|                                 | MIC <sub>90</sub>              | 0.75                     | 0.06      | 0.045     | 0.09       | 0.37      | 8        | 8         | 8         | 6         |
| <i>C. lusitaniae</i> (n=4)      | Range                          | 1-2                      | 0.12-1    | 0.03-0.06 | 0.06-0.25  | 0.25      | 0.5-1    | 0.12-0.25 | 0.01-0.06 | 0.06-0.12 |

|                              |                   |     |           |           |           |           |       |           |           |           |
|------------------------------|-------------------|-----|-----------|-----------|-----------|-----------|-------|-----------|-----------|-----------|
|                              | MIC <sub>50</sub> | 1.5 | 0.56      | 0.04      | 0.15      | 0.25      | 0.75  | 0.18      | 0.03      | 0.09      |
|                              | MIC <sub>90</sub> | 2   | 1         | 0.06      | 0.25      | 0.25      | 1     | 0.25      | 0.06      | 0.12      |
| <i>C. glabrata</i> (n=6)     | Range             | 2   | 0.5       | 0.5       | 1         | 1         | 0.5   | 1         | 0.5-1     | 0.06      |
|                              | MIC <sub>50</sub> | 2   | 0.5       | 0.5       | 1         | 1         | 0.5   | 1         | 0.75      | 0.06      |
|                              | MIC <sub>90</sub> | 2   | 0.5       | 0.5       | 1         | 1         | 0.5   | 1         | 1         | 0.06      |
| <i>C. rugosa</i> (n=4)       | Range             | 2   | 0.03-0.06 | 0.03-0.06 | 0.12-0.25 | 0.01-0.06 | 0.5-2 | 0.12-0.25 | 0.01-0.03 | 0.06-0.12 |
|                              | MIC <sub>50</sub> | 2   | 0.03      | 0.03      | 0.25      | 0.01      | 0.5   | 0.25      | 0.03      | 0.06      |
|                              | MIC <sub>90</sub> | 2   | 0.05      | 0.05      | 0.25      | 0.04      | 1.55  | 0.25      | 0.03      | 0.10      |
| <i>C. albicans</i> (n=3)     | MIC <sub>50</sub> | 2   | 0.03      | 0.06      | 0.25      | 0.5       | 0.25  | 0.25      | 0.03      | 0.5       |
| <i>C. parapsilosis</i> (n=1) | MIC               | 1   | 0.125     | 0.06      | 0.06      | 0.25      | 1     | 0.5       | 0.5       | 0.06      |

<sup>a</sup>FLU, fluconazole; ITC, itraconazole; VRC, voriconazole; ISA, isavuconazole; POS, posaconazole; AMB, amphotericin B; MFG, micafungin; AFG, anidulafungin; 5FC, flucytosine. <sup>b</sup>MIC<sub>50</sub>, MIC at which 50% of test isolates were inhibited. <sup>c</sup>MIC<sub>90</sub>, MIC at which 90% of test isolates were inhibited.
